# Supplementary material for: Reactive Dual Magnetron Sputtering: A Fast Method for Preparing Stoichiometric Microcrystalline ZnWO4 Thin Films
Source: MDPI journal article supplement (doi:10.3390/surfaces4020013), 2021-04-27
Supplement: s1 [file s1]

# Reactive Dual Magnetron Sputtering: A Fast Method for Preparing Stoichiometric Microcrystalline ZnWO<sub>4</sub> Thin Films

Yannick Hermans, Faraz Mehmood, Kerstin Lakus-Wollny, Jan P. Hofmann, Thomas Mayer and Wolfram Jaegermann \*

## Supplementary Materials Supporting Figures

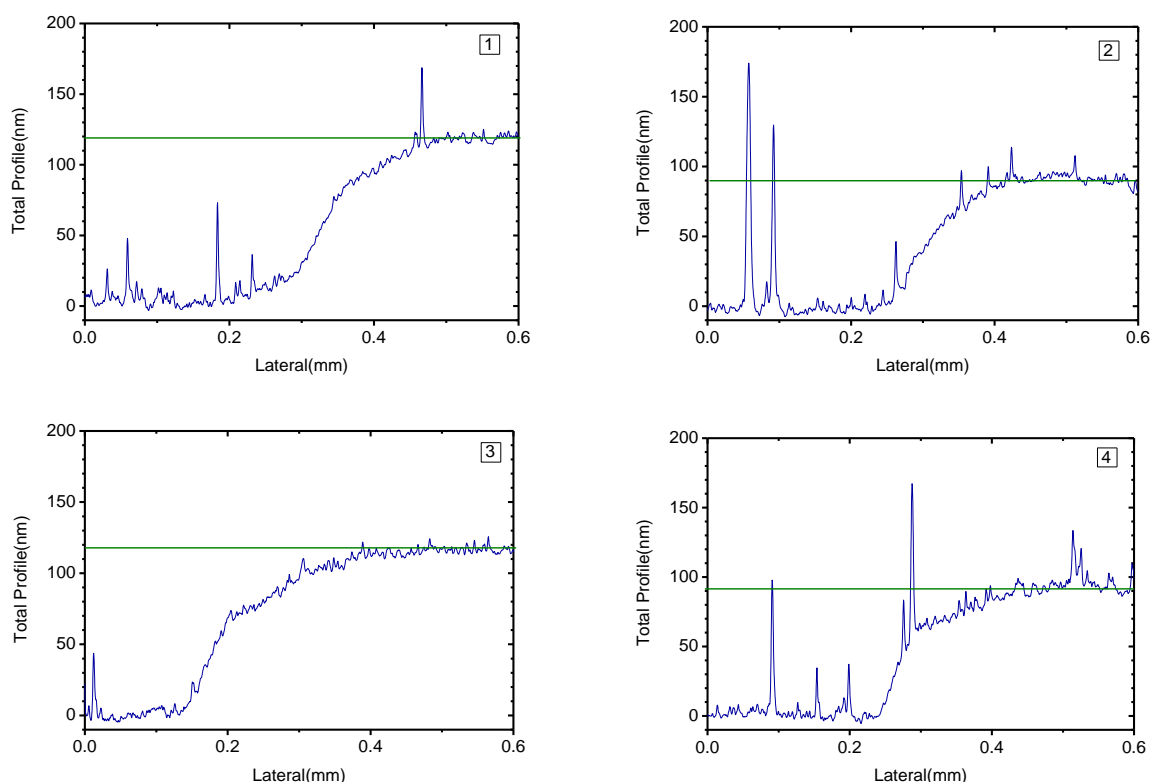

**Figure S1.** Sputter profiles of WO<sub>3</sub> deposited using standard DC sputter deposition parameters. The standard parameters comprise a process atmosphere of 50% O<sub>2</sub> and 50% Ar, an FTO substrate hold at room temperature, a sputter power of 25 W, a process pressure of 0.005 mbar and a substrate-magnetron distance of 20 cm. The spikes in the figure are due to dust.

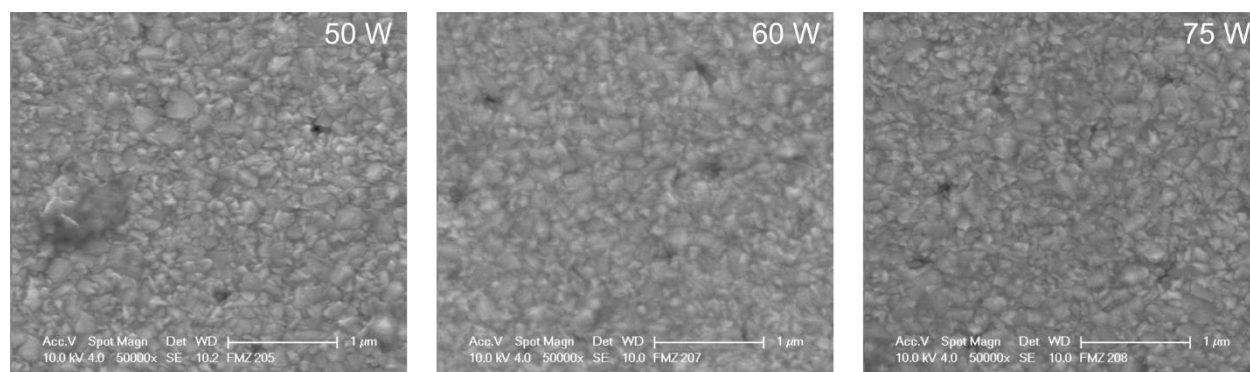

**Figure S2.** SEM images of ZnO thin films deposited at different sputtering powers keeping other deposition parameters constant (50%/50% O<sub>2</sub>/Ar).

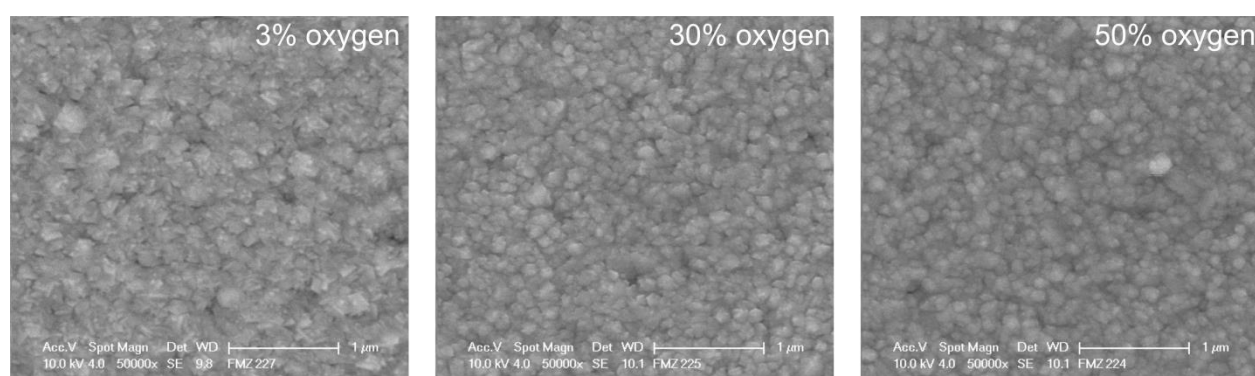

**Figure S3.** SEM images of ZnO thin films deposited using different oxygen contents in the process gas keeping other deposition parameters constant ( $P = 60$  W). Argon is used as filler gas.

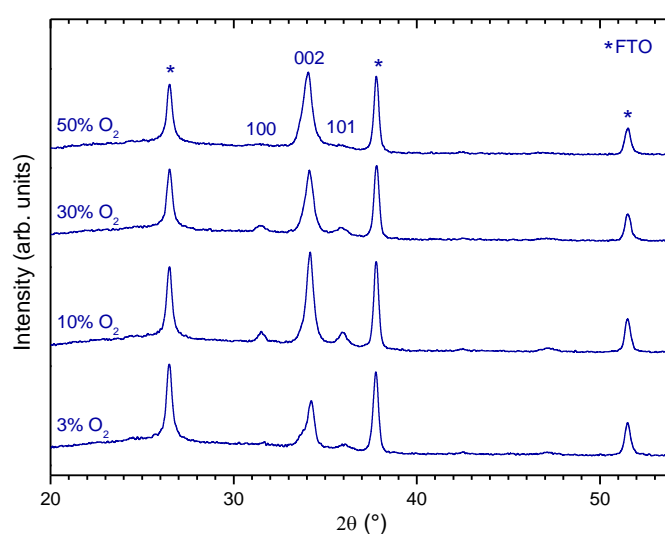

**Figure S4.** X-ray diffractograms of ZnO thin films deposited using different oxygen contents in the process gas keeping other deposition parameters constant ( $P = 60$  W). Argon is used as filler gas.

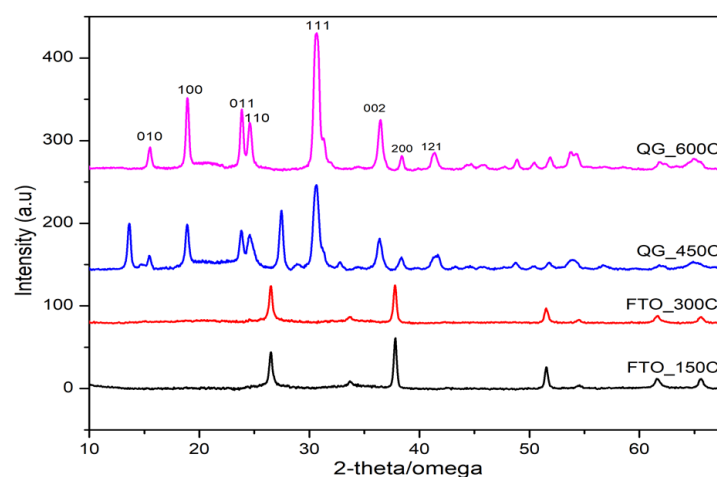

**Figure S5.** X-ray diffractograms of ZnWO<sub>4</sub> thin films annealed at different temperatures for 10 h in air. FTO: glass/FTO substrates and QG: quartz glass substrates. The indices in the graph correspond to ZnWO<sub>4</sub>. For 150 °C and 300 °C mostly FTO reflexes can be seen and a small peak at 34° which could be of ZnO. At 600 °C phase pure ZnWO<sub>4</sub> was obtained. The extra reflexes for the 450 °C annealed sample could not be assigned.

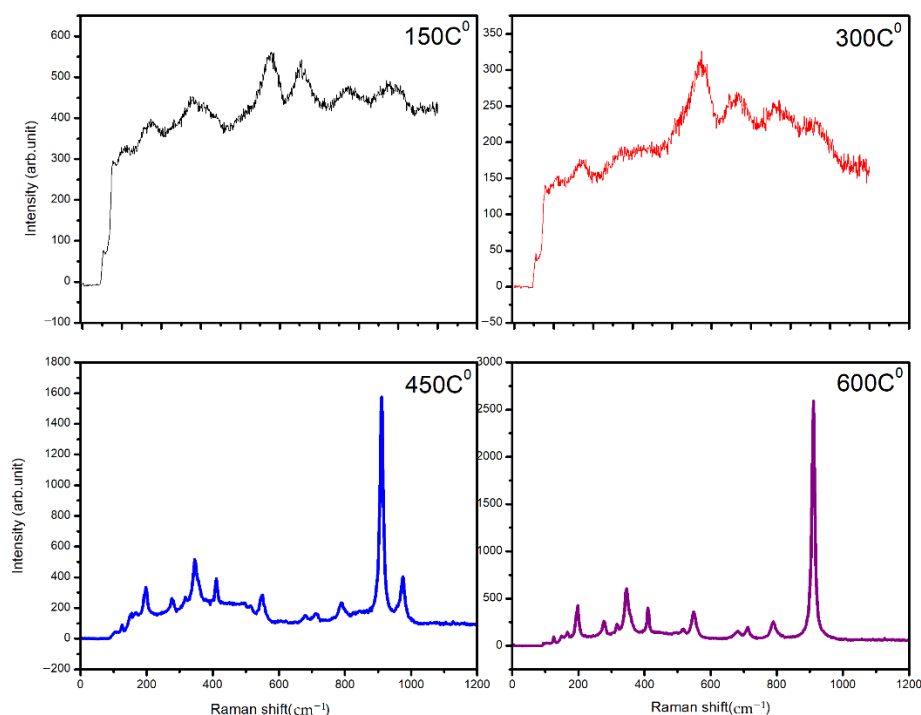

**Figure S6.** Raman spectra of  $\text{ZnWO}_4$  thin films annealed at different temperatures for 10 h in air. The samples annealed at 150 °C and 300 °C appear to be amorphous, while the sample annealed at 450 °C does not appear to be phase pure (additional peak at 970  $\text{cm}^{-1}$ ).

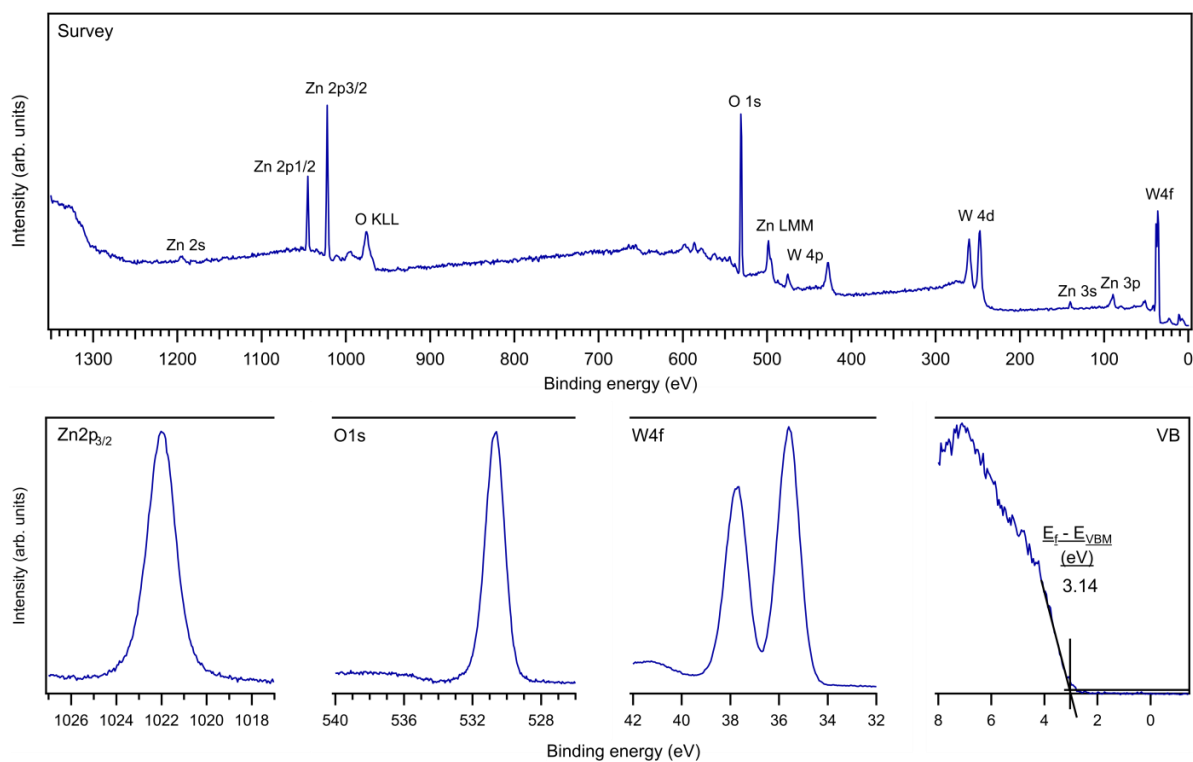

**Figure S7.** Survey, Zn 2p<sub>3/2</sub>, O 1s and W 4f core level, and valence band (VB) XPS spectra of a 15 nm thick amorphous  $\text{ZnWO}_4$  film.

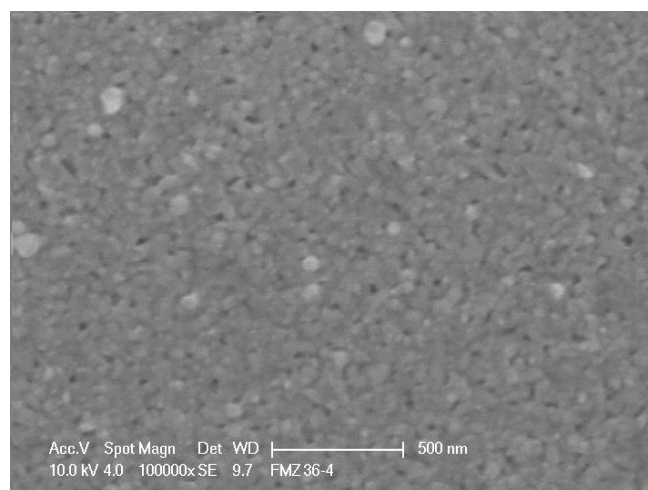

**Figure S8.** SEM image of 100 nm monoclinic ZnWO<sub>4</sub> thin films annealed in air at 600 °C for 10 h.

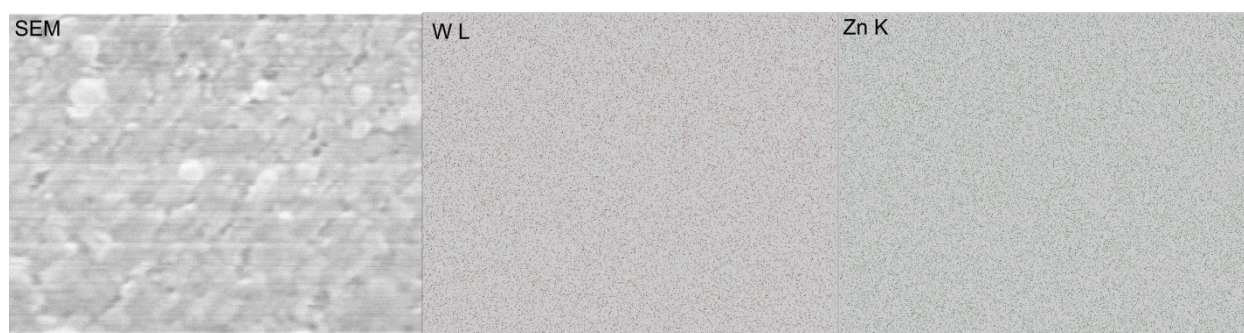

**Figure S9.** SEM-EDS of 100 nm monoclinic ZnWO<sub>4</sub> thin films annealed in air at 600 °C for 10 h. In green Zn K and in red W L.

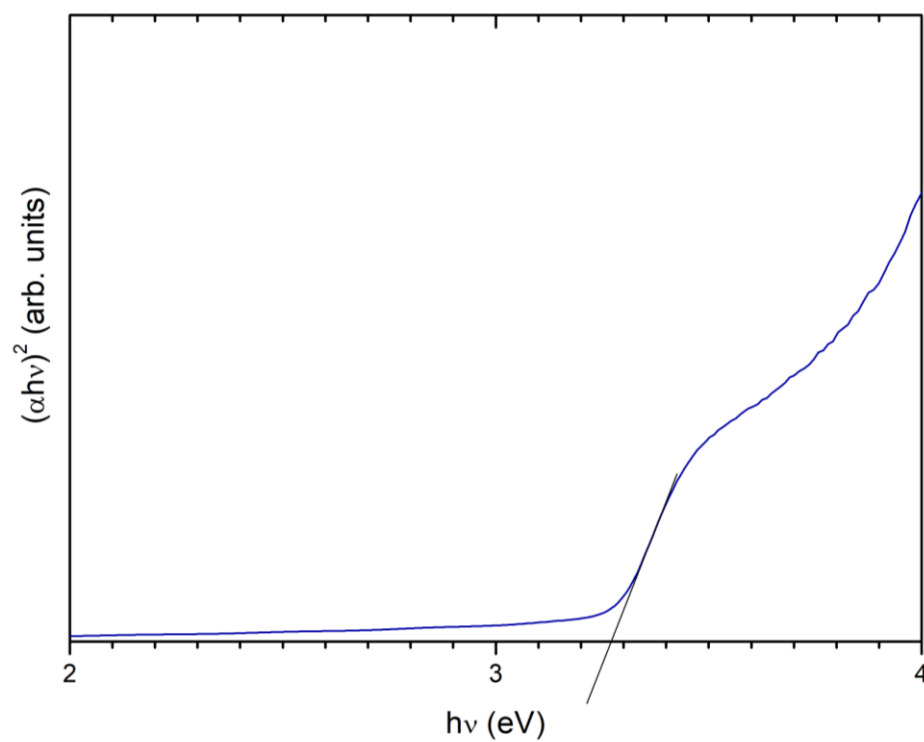

**Figure S10.** Tauc plot for the direct optical transition of the monoclinic ZnWO<sub>4</sub> thin film.

### Supporting Methods

The relative XPS surface stoichiometries were determined using CasaXPS according to:

$$[i]\% = \frac{A_i}{s_i \sum_n \frac{A_n}{s_n}} \cdot 100\%$$

with  $[i]\%$  the atomic percentage of species  $i$  using core level  $i$ ,  $A_i$  the area of core level  $i$ ,  $s_i$  the sensitivity factor of core level  $i$ . The sensitivity factors can be described by:

$$s = \sigma \cdot \lambda \cdot T$$

with  $\sigma$  being the photoionization cross section,  $\lambda$  being the inelastic mean free path (IMFP) and  $T$  being the transmission function. SPECS tabulated photoionization cross sections for the Phoibos 150 analyzer were used and amounted for Zn 2p<sub>3/2</sub>, O 1s and W 4f to 15.13, 2.77, 10.35, respectively. According to Powell [1] and Ebel [2] the IMFP can be approximated by:

$$\lambda = E_k^p$$

with  $E_k$  being the photoelectron kinetic energy and  $p$  being equal to 0.7414 [3]. The transmission function of the PHOIBOS analyzer is determined according to a modified method developed by Hemminger et al [4]. The transmission function is expressed by:

$$T \propto E_p \cdot (E_k/E_p)^{b(E_k/E_p)}$$

with  $E_k$  being the photoelectron kinetic energy and  $E_p$  being the pass energy. The transmission function equation is automatically fitted to the experimental data using the Specslab 2 measurement software.

### Reference

1. Powell, C.J. The quest for universal curves to describe the surface sensitivity of electron spectroscopies. *J. Electron. Spectros. Relat. Phenomena* **1988**, *47*, 197–214, doi:10.1016/0368-2048(88)85012-6.
2. Ebel, H.; Ebel, M.F.; Baldauf, P.; Jablonski, A. The energy dependence of attenuation lengths in elements. *Surf. Interface Anal.* **1988**, *12*, 172–173, doi:10.1002/sia.740120226.
3. Jablonski, A. Universal energy dependence of the inelastic mean free path. *Surf. Interface Anal.* **1993**, *20*, 317–321, doi:10.1002/sia.740200409.
4. Hemminger, C.S.; Land, T.A.; Christie, A.; Hemminger, J.C. An empirical electron spectrometer transmission function for applications in quantitative XPS. *Surf. Interface Anal.* **1990**, *15*, 323–327, doi:10.1002/sia.740150505.
